# Supplementary material for: Effects of mean arterial pressure on arousal in sedated ventilated patients with septic shock: a SEPSISPAM post hoc exploratory study
Source: PubMed Central journal article supplement (PMC6509319; doi:10.1186/s13613-019-0528-5), 2019-05-09

### Patients with chronic hypertension

— Low-target group  
— High-target group

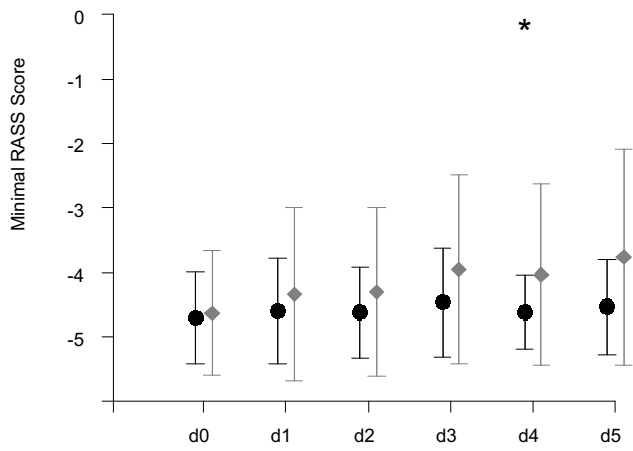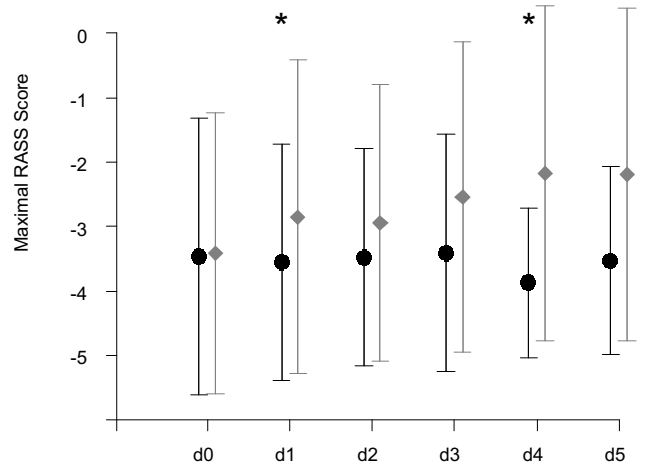

### Patients without chronic hypertension

— Low-target group  
— High-target group

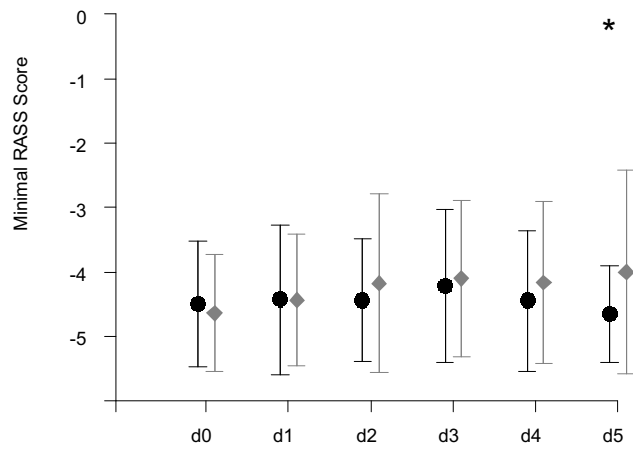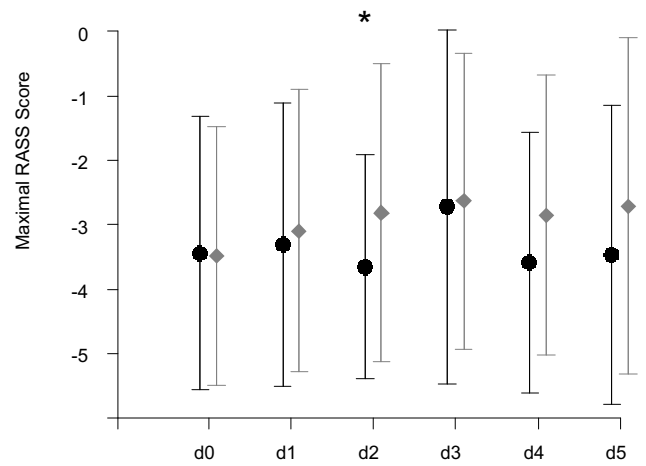

Supplement: 13613_2019_528_MOESM3_ESM.pdf [file 13613_2019_528_MOESM3_ESM.pdf]
